# Supplementary material
Source: PubMed Central journal article supplement (PMC6588429)

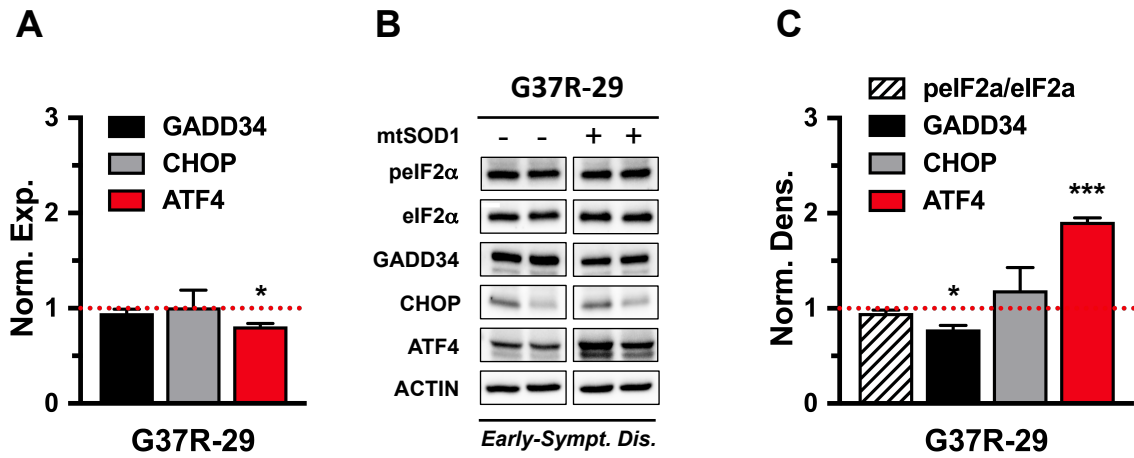

Supplement: NIHMS1527268-supplement-3.pdf [file NIHMS1527268-supplement-3.pdf]
